# Supplementary material
Source: MDPI journal article supplement (https://www.mdpi.com/2071-1050/16/6/2579)
Supplement: s1 [file s1]

**Table S1: Meteorological data****Meteorological station MAKSIMIR**

Latitude: 45°49'17.04"

Longitude: 16°2'1.32"

**Data for period:** 27. 5. 2022 - 10. 07. 2022

|                                          | <b>average</b> | <b>SD</b> | <b>min</b> | <b>max</b> |
|------------------------------------------|----------------|-----------|------------|------------|
| Average daily air temperature (°C)       | 22,560         | 4,296     | 13,2       | 30,2       |
| Daily rainfall (mm)                      | 2,380          | 3,916     | 0,0        | 12,5       |
| Average daily air humidity (%)           | 57,844         | 8,335     | 42,0       | 79,0       |
| Average daily atmospheric pressure (hPa) | 1000,982       | 3,349     | 993,1      | 1007,7     |
| Daily sunshine sum (h)                   | 10,998         | 3,124     | 3,0        | 14,5       |
| Daily evaporation (mm)                   | 6,420          | 1,958     | 1,3        | 10,7       |
| Daily soil temperature at 2 cm depth     | 26,444         | 4,103     | 15,8       | 32,2       |
| Daily soil temperature at 5 cm depth     | 25,596         | 3,946     | 16,0       | 30,7       |
| Daily soil temperature at 10 cm depth    | 24,922         | 3,856     | 16,2       | 29,9       |
| Daily soil temperature at 20 cm depth    | 24,340         | 3,728     | 16,7       | 29,0       |
| Daily soil temperature at 30 cm depth    | 23,673         | 3,641     | 16,6       | 28,2       |
| Average daily wind speed (m/s)           | 1,549          | 0,501     | 1,1        | 4,1        |

**Maksimir lake****Data for period:** 02. 6. 2022 - 10. 07. 2022

|                                    | <b>average</b> | <b>SD</b> | <b>min</b> | <b>max</b> |
|------------------------------------|----------------|-----------|------------|------------|
| Average water temperature (°C)     | 24,54875       | 3,593238  | 19,39      | 31,74      |
| pH                                 | 7,9825         | 0,177341  | 7,75       | 8,22       |
| Percentage dissolved oxygen (% DO) | 66,675         | 10,76154  | 43,6       | 77,6       |

Figure S1: Polymer-based bags before degradation in different environments

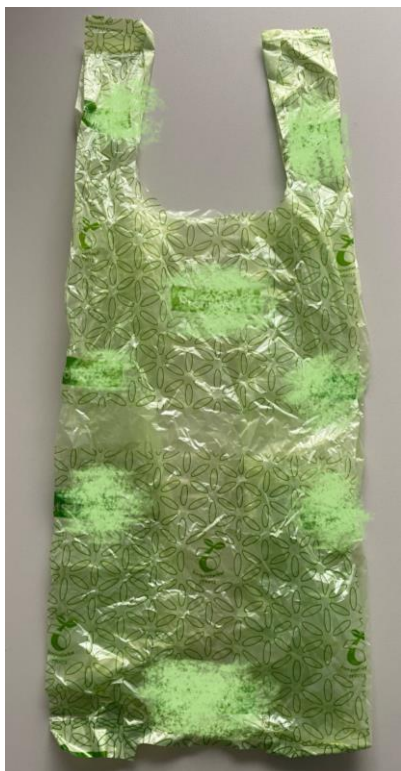

Green polymer-based bag

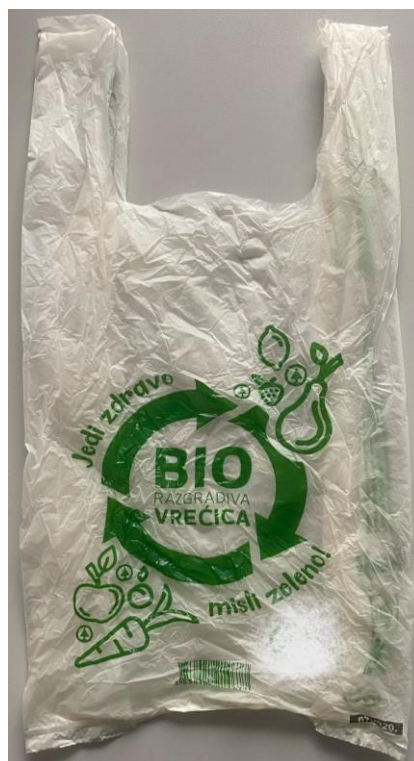

White polymer-based bag

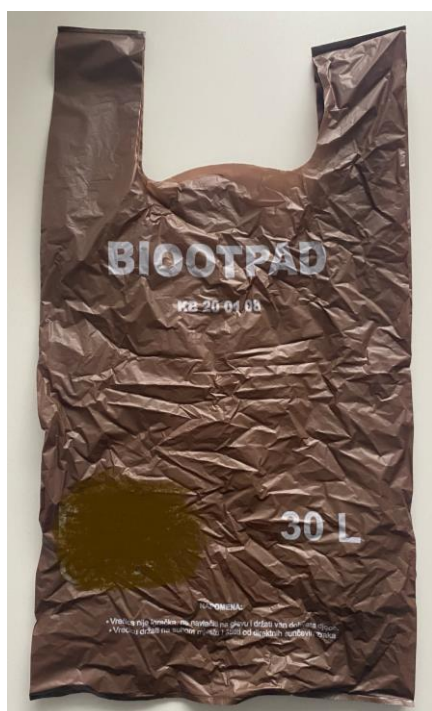

Brown polymer-based bag

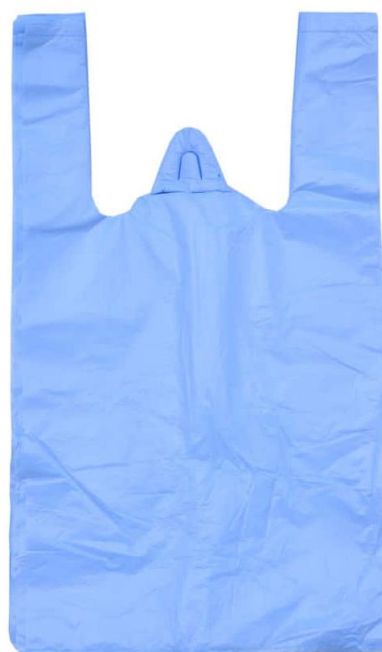

Blue polymer bag – conventional plastic bag
